# Supplementary material for: Stable iron isotope signals indicate a “pseudo-abiotic” process driving deep iron release in methanic sediments
Source: Copernicus journal article supplement (doi:10.5194/bg-22-1673-2025), 2025-03-31
Supplement: Supplementary file 1 [file bg-22-1673-2025-supplement.zip]

**Supplement to Henkel et. al., “Stable iron isotope signals indicate a “pseudo-abiotic” process driving deep iron release in methanic sediments”**

**Table S1:** Reactions implemented into the diagenetic model and rate expressions.

| <b>Reactions</b>                                                                                                                              |    |    |
|-----------------------------------------------------------------------------------------------------------------------------------------------|----|----|
| $\text{CH}_2\text{O} + 4\text{Fe}(\text{OH})_3 \rightarrow \text{HCO}_3^- + 4\text{Fe}^{2+} + 3\text{H}_2\text{O} + 7\text{OH}^-$             | *  | R1 |
| $\text{Fe}(\text{OH})_3 + 2\text{HS}^- \rightarrow \text{FeS}_2 + 2\text{OH}^- + \text{H}_2\text{O} + 0.5\text{H}_2$                          |    | R2 |
| $\text{Fe}^{2+} + 2\text{HS}^- \rightarrow \text{FeS}_2 + \text{H}_2$                                                                         |    | R3 |
| $\equiv \text{S} - \text{H}^0 + \text{Fe}^{2+} + \text{HCO}_3^- \rightarrow \equiv \text{S} - \text{Fe}^+ + \text{CO}_2 + \text{H}_2\text{O}$ | ** | R4 |
| <b>Rate expressions</b>                                                                                                                       |    |    |
| $R_1 = R_G = -k_1 G = -k_1 G_0 \exp(-k_1 z/\omega)$                                                                                           |    | E1 |
| $R_2 = k_2 [\Sigma \text{H}_2\text{S}]$                                                                                                       |    | E2 |
| $R_3 = k_3 [\text{Fe}^{2+}] [\Sigma \text{H}_2\text{S}]$                                                                                      |    | E3 |
| $R_4 = -k_4 [\text{Fe}^{2+}]$                                                                                                                 |    | E4 |

\*Conversion factor of organic matter from wt% to mM is  $\frac{1-\phi}{\phi} \frac{\rho_d}{M_C} \frac{1}{100\%}$ .  $\rho_d$  is the dry bulk density (2.6 g cm<sup>-3</sup>), and  $M_C$ = molar weight of carbon (12 g mol<sup>-1</sup>).

\*\* Adsorption reaction after Wang and Van Capellen (1996),  $\equiv \text{S} - \text{H}^0$  represents a hydrated surface site.

**Table S2:** Final parameters in the model and boundary conditions.

|                                                        | Symbol         | Unit                              | Value  |
|--------------------------------------------------------|----------------|-----------------------------------|--------|
| <b>Parameters</b>                                      |                |                                   |        |
| Porosity                                               | $\phi$         | -                                 | 0.7    |
| Sedimentation rate                                     | $\omega$       | cm yr <sup>-1</sup>               | 0.16   |
| Sediment thickness                                     |                | cm                                | 400    |
| C <sub>org</sub>                                       | G <sub>0</sub> | wt%                               | 0.12   |
| 1 <sup>st</sup> order deg. coeff. C <sub>org</sub>     | $k_1$          | yr <sup>-1</sup>                  | 1.0E-6 |
| Rate constant of R2                                    | $k_2$          | yr <sup>-1</sup>                  | 0.4    |
| Rate constant of R3                                    | $k_3$          | mM <sup>-1</sup> yr <sup>-1</sup> | 4.0    |
| Rate constant of R4                                    | $k_4$          | yr <sup>-1</sup>                  | 1.0E-5 |
| Fractionation factor for R1                            | $\alpha_1$     | -                                 | 0.997  |
| Fractionation factor for R2                            | $\alpha_2$     | -                                 | 1.000  |
| Fractionation factor for R3                            | $\alpha_3$     | -                                 | 0.998  |
| Fractionation factor for R4                            | $\alpha_4$     | -                                 | 1.004  |
| $\delta^{56}\text{Fe}_{\text{Fe}(\text{OH})_3}$        |                |                                   | 0.00   |
| <b>Boundary condition</b>                              |                |                                   |        |
| Upper boundary                                         | z <sub>0</sub> | cm                                | 70     |
| Concentration of H <sub>2</sub> S at z <sub>0</sub>    | -              | μM                                | 527    |
| Concentration of Fe <sub>diss</sub> at z <sub>0</sub>  | -              | μM                                | 0.01   |
| $\delta^{56}\text{Fe}_{\text{diss}}$ at z <sub>0</sub> | -              | -                                 | 0.00   |
| Lower boundary                                         | z <sub>1</sub> | cm                                | 470    |
| Concentration of H <sub>2</sub> S at z <sub>1</sub>    | -              | μM                                | 0      |
| Concentration of Fe <sub>diss</sub> at z <sub>1</sub>  | -              | μM                                | 450    |
| $\delta^{56}\text{Fe}_{\text{diss}}$ at z <sub>1</sub> | -              | -                                 | 0.00   |

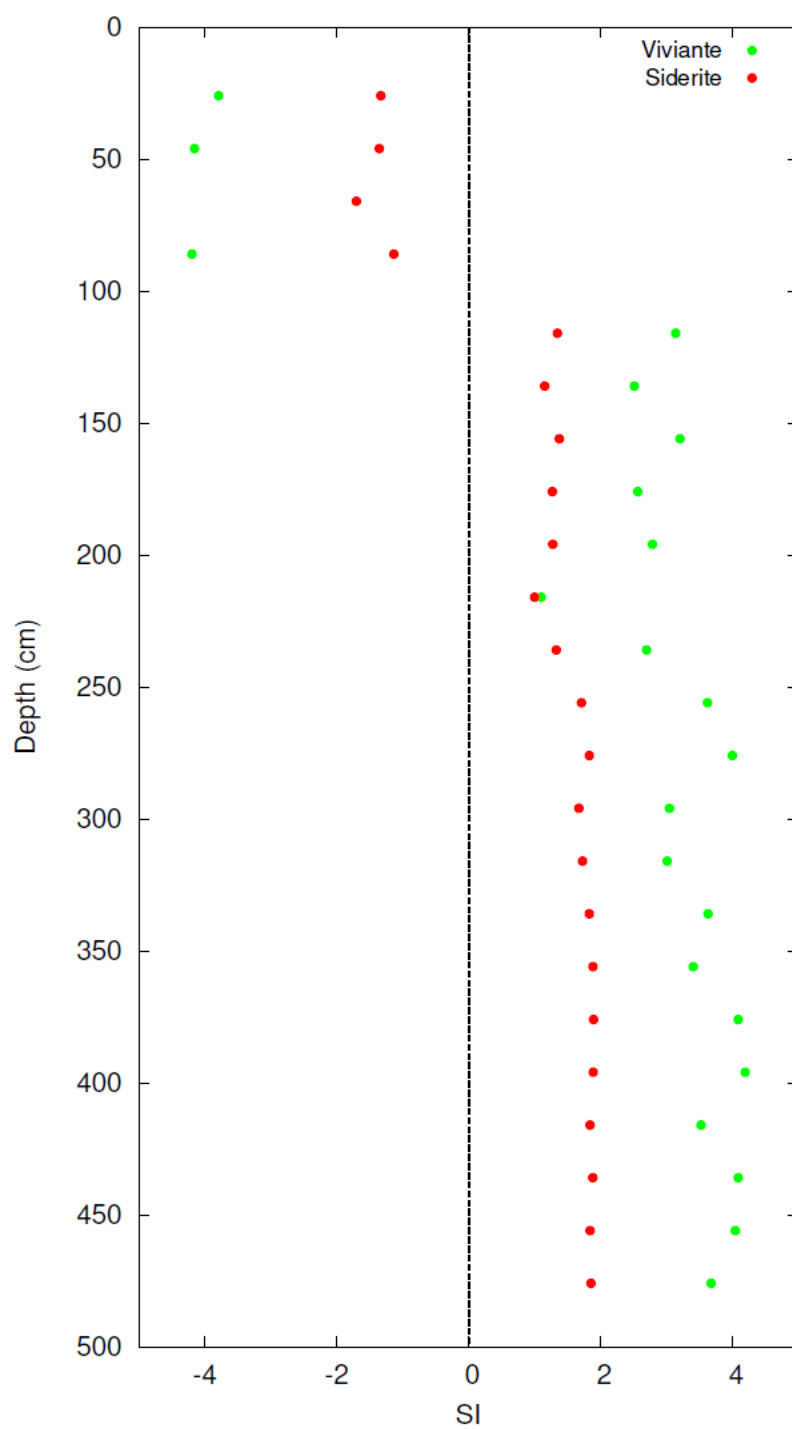

**Figure S1:** Saturation indices for vivianite and siderite as calculated with PHREEQC for Site HE443/010.

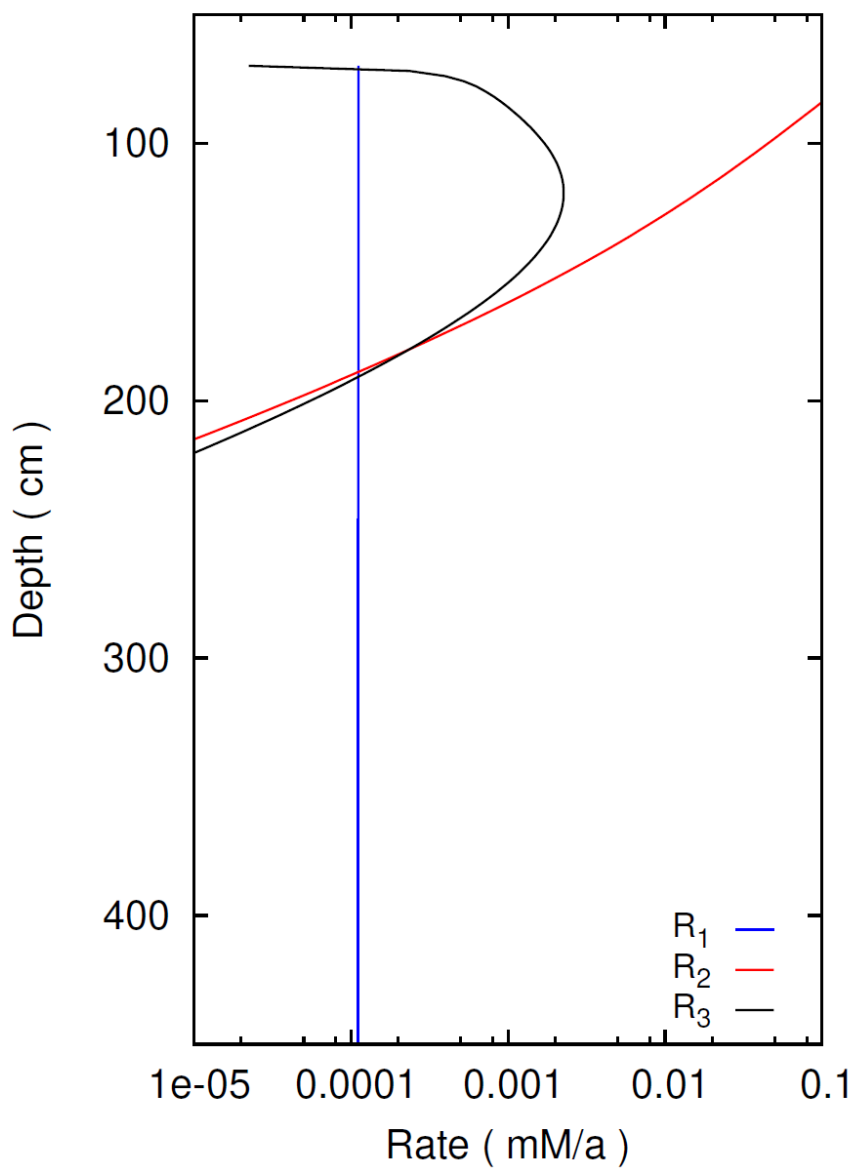

**Figure S2:** Reaction rates for  $R_1$ ,  $R_2$ , and  $R_3$  over depth as determined by fitting the model to the  $\text{Fe}_{\text{diss}}$ ,  $\text{H}_2\text{S}$  and  $\delta^{56}\text{Fe}_{\text{diss}}$  profiles with  $k_2 = 0.4$ ,  $k_3 = 4$ ,  $\alpha_1 = 0.997$ ,  $\alpha_2 = 1$ , and  $\alpha_3 = 0.998$ .
