# Supplementary material for: Stable iron isotope signals indicate a “pseudo-abiotic” process driving deep iron release in methanic sediments
Source: Copernicus journal article supplement (doi:10.5194/bg-22-1673-2025), 2025-03-31
Supplement: Supplementary file 1 [file bg-22-1673-2025-supplement.zip]

## Sheet: Metadata
GC (gravity core)	Latitude: 54.086500 * Longitude: 7.970170
	Is already in PANGAEA! https://doi.pangaea.de/10.1594/PANGAEA.893766
MUC (multicorer core)	Latitude: 54.08567 * Longitude: 7.969167
	Date/Time:		30.4.2015	09:52:59
	Depth:		30 m
Pore-water analyses:
Sulfate	Ion chromatography (Metrohm Compact IC 761 )
Sulfide	Spectrophotometrically measured using methylene blue method (Cline, 1969)
dissolved Fe	Measured using inductively coupled plasma-optical emission spectrometry (Iris Intrepid II ICP-OES)
DIC	Measured directly using a SEAL nutrient analyzer (based on Hall and Aller, 1992)
Mn, Ca, Mg, P	Measured using inductively coupled plasma-optical emission spectrometry (Iris Intrepid II ICP-OES)
CH4	Gas chromatography (Thermo Finnigan TRACE GC with FID)
PO4	QuAATro SEAL nutrient analyzer
δ56Fe of dissolved Fe	Sample processing at University of Cologne: Fe was first pre-concentrated and extracted from the salt matrix using the NTA Superflow resin after Henkel et al. (2016, 2018). Purified by anion exchange chromatography using Dowex 1X8 200-400 resin. Analyses performed using a ThermoFinnigan Neptune multicollector-ICP-MS equipped with an Aridus desolvating nebulizer system at the Steinmann Institute i…
pH	pH electrode and a WTW pH meter
Solid-phase analyses:
AVS (acid volatile sulfide)	Hot extraction using 6 M HCl and trapping of extracted S as Ag2S.
CRS (chromium reducible sulfide)	Hot extraction using and a chromous chloride solution and trapping of extracted S as Ag2S.
acetate-leachable Fe	Sequential Fe extraction after Poulton and Canfield (2005) and Henkel et al. (2016). Fe aca (1 M Na-acetate, 24 h, pH 4.5); Fe hyam (1 M hydroxylamine-HCl in 25% v/v acetic acid, 48 h); Fe di-ct (Na-dithionite (50 g L-1)/0.02 M Na-citrate, 2 h, pH 4.8); Fe oxa (0.2 M ammonium oxalate/0.17 M oxalic acid, 6 h). Iron contents determined by ICP-OES (Inductively coupled plasma – optical emission spect…
hydroxylamine-HCl-leachable Fe
dithionithe-leachable Fe
oxalate-leachable Fe
bulk elemental composition	Dissolution of dry sediment in a mixture of 65% HNO3 (3 ml), 30% HCl (2 ml), and 40% suprapur® HF (0.5 ml) in a CEM Mars Xpress microwave system. Elemental contents determined by ICP-OES (Inductively coupled plasma – optical emission spectroscopy; Iris Intrepid II).
δ56Fe analysis of sequentially extracted Fe pools	Processing after Henkel et al. (2016). Column separation after Schoenberg and von Blanckenburg (2005). Isotope analysis on a ThermoScientific Neptune plus Multicollector-ICP-MS (standard-sample bracketing method with IRMM-014), Isotope Geochemistry Group at MARUM-Centre for Marine Environmental Sciences, University of Bremen.
TC	CNS (Elementar Vario EL III) analyzer
TOC	Carbon–sulfur analyzer (CS-2000, ELTRA) after removal of inorganic carbon with HCl
References
Poulton andCanfield (2005)	10.1016/j.chemgeo.2004.09.003
Henkel et al. (2016)	10.1016/j.chemgeo.2015.12.003
Henkel et al. (2018)	10.1016/j.gca.2018.06.042
Schoenberg and von Blanckenburg (2005)	10.1016/j.ijms.2004.11.025
Cline 1969	10.4319/lo.1969.14.3.0454

## Sheet: pore water
	core depth (cm)	actual depth (cm)	Sulfate (mM)	Sulfide [µM]	Fe dissolved (µM)	PO4 (µM)	P [µM]	DIC (mM)	CH4 (mM)	CH4 (mM) end of segments	Mn (µM)	NH4 [mM]	Ca [mM]	Mg [mM]	pH
MUC	-1	-1	25.2954		0			2.517
MUC	1	1	25.4204		6.76873	9.15		3.0155			36.2957	0.0447	9.20474	47.4007
MUC	2	2	25.2784		25.8394	10.45		2.949			39.1917	0.1514	9.74174	49.5207
MUC	3	3	25.0814		66.2548	13.85		3.068			53.5055	0.20485	9.28565	47.6092
MUC	4	4	24.9864		172.782	17.35		3.12			51.4185	0.20425	9.4493	48.2569
MUC	5	5	24.7884		182.505	20.25		3.0945			48.2662	0.12175	9.08634	46.3011
MUC	6	6	24.9044		181.753	35.8		3.0835			46.5425	0.08875	9.31343	47.9045
MUC	7	7	24.9864		80.2579	18.05		3.3495			40.7387	0.0976	9.42754	47.497
MUC	8	8	24.8244		78.0016	43.5		3.5235			32.4957	0.10685	8.89349	45.7119
MUC	9	9			20.8255	22.25		3.6875				0.1141
MUC	10	10	24.8414		10.4038	28.7		3.8865			23.4681	0.11345	9.18209	47.4826
MUC	12	12	24.2844		2.18462	54.65		4.159			25.1392	0.14795	9.31847	48.183
MUC	14	14	24.5464		0.966962	54.35		4.5675			20.2569	0.18395	9.07094	46.837
MUC	16	16	24.3344	8.97103	0.125347	83.3		5.2535			17.9827	0.24	8.87762	45.3533
MUC	18	18	23.7754	9.96535	0.125347	83		5.74			17.0714	0.283	9.26009	47.2912
MUC	20	20	22.2934			105		7.0965			10.4372	0.4257	9.19815	47.3929
MUC	22	22
MUC	24	24	20.3184	16.5942		153.75		9.416			5.15061	0.61105	9.27241	47.9509
MUC	26	26	19.4094	25.5431		132.15		10.449			2.95853	0.7549	8.96599	46.8966
MUC	28	28	18.1814	48.0259		180.65		11.8155			2.24016	0.89665	8.79423	45.1465
MUC	30	30	16.6764	60.5102		186.55		13.6395			0.776486	1.0714	8.69164	44.4349
GC	10	26	19.2764	54.1024		154.6	162.448	10.749	0.0135299		7.53951	0.66405	8.88656	47.0543	7.78
GC	30	46	13.9714	173.974		263.35	271.631	18.933	0.0337249		0.464866	1.4568	8.81668	46.6959	7.86
GC	50	66	2.19744	525.976		446.05	428.463	38.3255	0.131185		0.0370501	3.2199	8.27582	45.4744	7.83
GC	70	86	0.0604444	229.225		528.75		43.8005	3.03671			4.26255			7.92
GC	100	116	0.219444	7.6421	118.008		508.233	49.802	2.51592		30.0584		8.07159	46.7106	7.41
GC	120	136	0.0284444		85.0027	453.2	507.833	53.6165			35.5465	7.36785	8.02371	47.4821	7.29
GC	140	156	0.00644444		200.216	439.5	509.297	57.0125			37.5287	8.28495	7.65505	47.3089	7.29
GC	160	176	0.00544444		189.809	372.2	353.116	58.864	2.19252		35.7784	9.39345	8.08002	49.0916	7.21
GC	180	196	0.0154444		191.251	409.1	476.839	61.386			38.2653	10.1289	8.31718	50.318	7.22
GC	200	216	0.0124444		114.998		161.384	59.38			25.0401	11.0997	7.49994	49.5193	7.18
GC	220	236	0.00144444		234.362	322.45	354.579	62.0035	2.5379		32.0382	11.0843	8.19019	51.0313	7.49
GC	240	256	0.00344444		259.052	261.1	345.538	61.7605			28.5513	11.5844	8.44442	52.5879	7.47
GC	260	276	0.00144444		339.626	328.55	359.349	61.81			26.868	11.8527	8.62515	53.2502	7.24
GC	280	296	0.000444444		230.585	200.2	215.729	63.8615			26.5756	13.8205	8.38345	52.3832	7.21
GC	300	316	0.00244444		261.078	194.15	170.476	63.877	3.05161		25.8249	13.0638	8.00048	51.1459	7.26
GC	320	336	0.00144444		333.334	273.25	244.255	63.671	3.10058		27.3941	12.7899	8.241	52.5725	7.21
GC	340	356	0.00144444		372.697	289.95	156.972	64.621	2.81295		19.9386	12.9997	6.69678		7.57
GC	360	376	0.00154444		387.088	328.4	338.972	64.922	2.20093		20.4898	12.8133	7.97306	51.2231	7.17
GC	380	396	0.000444444		384.076	298.5	385.411	64.4815	4.81783		18.7894	12.8365	7.87926	50.6072	7.14
GC	400	416	0.00144444		341.099	275.15	197.232	62.7215	2.46545		15.0685	12.9045	5.95788		7.13
GC	420	436	0.000444444		383.264		324.02	61.3815	1.93049		23.0546		7.60921	51.5512	7.19
GC	440	456	-0.00155556		343.694	223.5	382.207	64.884	2.29178		26.4987	12.2898	7.47903	51.8627	7.18
GC	460	476	0.0104444			259.9	256.791	65.592			40.4623	12.3891	10.6158		7.21
GC	475	491	0.0214444
GC	188	204								4.76595
GC	288	304								4.27159
GC	388	404								3.71414
GC	488	504								4.72109
	Already in PANGAEA, but with core depth, not sediment depths!

## Sheet: pore water isotopes
	core depth (cm)	actual depth (cm)	Comment	δ56/54Fe [‰]	± (2sd)	δ57/54Fe [‰]	± (2sd)
MUC	1
MUC	1	1		-1.75109	0.120827	-2.57503	0.236828
MUC	3	1	duplicate	-1.6321	0.098926	-2.37438	0.16456
MUC	4	3		-1.27159	0.0850938	-1.90921	0.145206
MUC	5	4		-1.37644	0.0876168	-2.00155	0.138912
MUC	8	5		-0.946045	0.0705108	-1.40384	0.126651
MUC	8	8		-0.967769	0.111441	-1.45925	0.191991
GC	110	8	duplicate	-1.12913	0.141115	-1.65817	0.179135
GC	130	126		-0.0501892	0.0804732	-0.103418	0.168949
GC	170	146		-0.0557611	0.100813	-0.0917668	0.181785
GC	230	186		-1.2832	0.0967772	-1.95122	0.186794
GC	270	246		-0.948506	0.0916678	-1.38375	0.134301
GC	310	286		-0.642	0.0895209	-0.944747	0.139727
GC	350	326		-1.03309	0.0880542	-1.52215	0.159948
GC	430	366		-0.549642	0.0958893	-0.823821	0.160013
		446		-0.0836026	0.0992932	-0.10663	0.17662

## Sheet: solid phase
	core depth (cm)	actual depth (cm)	TOC	TN	TC	TIC	Al	Ba	Ca	Fe	K	Mg	Mn	P	S	Sr	Ti	AVS (wt%)	FeS2 (wt%)			Acetate-Fe (mg/g)	Hydrox-Fe (mg/g)	Dithionite-Fe (mg/g)	Oxalate-Fe (mg/g)	reactive Fe (mg/g)	AVS-Fe (mg/g)	FeS2-Fe (mg/g)
			wt%	wt%	wt%	wt%	g/kg	g/kg	g/kg	g/kg	g/kg	g/kg	g/kg	g/kg	g/kg	g/kg	g/kg
MUC	0.5	0.5	0.634	0.117	2.559	1.925	34.2072	0.278979	43.8576	19.0991	14.1259	7.79839	0.371366	0.596356	3.54055	0.189652	2.93611
MUC	1.5	1.5	0.934	0.189	3.036	2.102	36.5758	0.275551	48.7534	21.7515	14.8176	9.40919	0.391432	0.674915	4.75684	0.218845	2.88659
MUC	2.5	2.5	0.88	0.166	2.98	2.1	37.4302	0.266354	48.8309	22.4464	14.7379	8.54246	0.385616	0.600277	4.1163	0.20964	2.82708
MUC	3.5						36.1416	0.279047	43.8977	20.9624	14.4462	7.80984	0.355442	0.525126	3.61154	0.18658	2.84082
MUC	4.5	4.5	0.862	0.133	2.679	1.817	39.2822	0.27576	43.7751	23.81	15.2934	8.45919	0.374403	0.548604	4.36819	0.184477	3.07589
MUC	5.5						39.7927	0.284063	43.3762	24.2213	15.4118	8.53526	0.369482	0.54314	4.59583	0.186509	2.98108
MUC	6.5	6.5	0.751	0.132	2.963	2.212	36.1899	0.265762	57.472	22.2544	14.3218	7.82881	0.338821	0.516885	5.24135	0.226193	2.72311
MUC	7.5						39.1289	0.273244	56.795	24.3546	14.8583	8.8933	0.379671	0.538409	6.39105	0.224318	2.98249
MUC	8.5	8.5	0.786	0.129	2.747	1.961	42.2553	0.271451	47.599	25.858	15.9419	9.3672	0.414392	0.546558	7.15191	0.203198	3.1406
MUC	9.5						39.2336	0.275306	52.8245	23.3631	14.9893	8.69341	0.391587	0.517729	6.25219	0.224111	2.99786
MUC	11.5	11.5	0.664	0.102	2.59	1.926	41.6654	0.26392	50.882	24.0804	15.7889	9.2603	0.429246	0.492915	8.17588	0.215779	2.96784
MUC	13.5						44.7948	0.262505	51.8972	28.0546	16.6476	10.4143	0.479668	0.618032	8.98435	0.221936	3.21783
MUC	15.5	15.5	0.787	0.123	2.917	2.13	46.6625	0.26146	52.6732	28.7134	17.047	10.6138	0.515247	0.568021	10.5154	0.227031	3.11922
MUC	17.5						52.9016	0.247554	54.4105	34.6718	18.3857	12.2503	0.592438	0.667907	13.3918	0.233693	3.44986
MUC	19.5	19.5	0.544	0.091	2.319	1.775	41.5913	0.262108	45.7854	23.1212	15.8471	9.19837	0.406847	0.515634	7.30933	0.194285	3.14994
MUC	21.5						44.2343	0.261117	41.0444	24.7258	16.5902	9.54835	0.413061	0.556879	7.36191	0.177567	3.04088
MUC	23.5	23.5	0.351	0.058	1.614	1.263	35.522	0.263412	36.2862	17.3213	14.4117	7.35861	0.336607	0.468767	4.11075	0.156119	3.12693
MUC	25.5	25.5	0.559	0.092	2.086	1.527	40.4143	0.267773	38.4147	20.673	15.9147	8.46635	0.348152	0.492275	5.09668	0.165592	3.05972
GC	10	26	1.104	0.21	3.351	2.247	61.1851	0.248369	45.5797	40.7887	20.8144	13.9454	0.673947	0.719362	14.4396	0.204882	3.61237		2.27261			1.44847	1.98675	2.28699	0.990939	6.71328		10.5784
GC	30	46	0.462	0.075	1.949	1.487	38.8105	0.269858	38.2478	20.6448	15.537	8.25791	0.350359	0.489367	5.42338	0.164692	3.10934	0.0151858	0.981987			0.866247	1.14179	1.16789	0.501807	3.67747	0.0964678	4.57087
GC	50	66	0.798	0.153	2.779	1.981	52.554	0.287954	43.7251	31.8817	18.7076	11.8757	0.496105	0.642179	8.5018	0.189672	3.62565	0.0204696	1.47121			1.76966	1.90342	2.07865	0.818218	6.56982	0.130034	6.84807
GC	70	86	0.988	0.192	3.123	2.135	56.1264	0.256318	44.6941	33.8209	19.4726	12.0597	0.434328	0.745522	8.25274	0.187264	3.44179	0.0500261	1.29404			2.27691	2.09302	2.24851	0.852217	7.47012	0.317792	6.0234
GC	100	116	0.756	0.143	2.613	1.857	48.9724	0.264114	40.3205	28.6156	17.8171	10.1121	0.37355	0.612771	5.29099	0.171887	3.14578	0.1648	0.74235			4.04684	1.9948	2.22772	0.77853	9.0475	1.0469	3.45543
GC	120	136	0.4	0.075	1.931	1.531	36.9558	0.268209	38.7377	18.5236	15.0394	7.31004	0.325	0.480069	3.83563	0.168898	3.00197	0.0141381	0.684521			1.01717	1.08362	1.00988	0.43394	3.5446	0.0898125	3.18625
GC	140	156	0.737	0.142	2.651	1.914	47.2907	0.262208	44.0062	27.4269	17.3367	10.0412	0.454207	0.627623	6.79741	0.187978	3.23005	0.0892389	1.18816			2.67619	1.73788	1.46723	0.649402	6.53112	0.566892	5.53057
GC	160	176	0.794	0.159	2.66	1.866	52.2333	0.265006	42.1122	29.8745	18.5171	10.8964	0.417222	0.701304	4.10161	0.177128	3.60632	0.0800531	0.649445			3.80992	2.08847	2.61983	0.891674	9.41016	0.508539	3.02298
GC	180	196	0.69	0.146	2.34	1.65	48.9167	0.268347	36.3905	27.6426	17.773	10.0642	0.449776	0.609451	6.84933	0.15184	3.41152	0.017662	1.12808			1.74212	1.54355	1.45618	0.661901	5.40402	0.112199	5.25089
GC	200	216	0.849	0.169	2.922	2.073												0.0391163	1.52408			2.98151	2.03356	1.66776	0.776977	7.45955	0.248487	7.09419
GC	220	236	1.028	0.214	3.244	2.216	58.6966	0.256645	45.8789	39.2554	20.0283	12.6673	0.806315	0.775919	8.55137	0.201979	3.59943	0.29925	1.04918			8.53257	2.49558	2.50918	1.0695	14.6066	1.90099	4.88363
GC	240	256	1.117	0.241	3.501	2.384	60.2859	0.25419	43.6942	38.5847	20.2421	12.8399	1.01313	0.775559	6.34451	0.192644	3.71974	0.104	0.95254			5.79974	2.81137	3.13824	1.14806	12.897	0.660663	4.43381
GC	260	276	1.143	0.267	3.614	2.471	66.9614	0.259821	45.4043	41.7956	21.746	13.8889	0.915278	0.86751	5.1369	0.200595	3.72421	0.0557664	0.76107			5.74875	3.20089	3.60871	1.32311	13.8815	0.354257	3.54257
GC	280	296	1.22	0.265	3.654	2.434	63.4392	0.251943	42.3733	41.6278	20.8139	13.6267	0.705614	1.03569	6.51127	0.191628	3.70629	0.11103	0.938887			6.90656	3.20416	3.53767	1.26479	14.9132	0.705319	4.37026
GC	300	316	0.588	0.119	2.308	1.72	42.9251	0.266794	39.2378	22.6454	16.3089	8.82964	0.368508	0.528696	3.43231	0.168023	3.00121	0.0287966	0.576321			2.48017	1.66862	1.6257	0.635453	6.40994	0.182931	2.68261
GC	320	336	1.072	0.227	3.525	2.453	57.467	0.261061	47.1821	34.7251	19.5365	12.3635	0.776863	0.722515	7.00345	0.201302	3.63149	0.0697636	1.20701				2.24861	2.30668	0.908551		0.443174	5.61829
GC	340	356	0.564	0.105	2.161	1.597	39.8273	0.269569	41.3796	19.5296	15.8403	7.94944	0.342182	0.489703	2.57466	0.177337	2.70642	0.0588196	0.547168			2.05791	1.36566	1.29104	0.524983	5.23946	0.373652	2.54691
GC	360	376	1.14	0.214	3.41	2.27	55.5139	0.255772	46.875	33.2702	19.0575	11.9701	0.677612	0.718348	5.04637	0.197767	3.51722	0.0805636	0.796174								0.511782	3.70597
GC	380	396	0.905	0.17	3.008	2.103	49.0354	0.264282	45.4968	29.246	17.5226	10.5886	0.577323	0.646903	5.38084	0.19321	3.50837	0.119161	0.855588			3.37758	2.15593	1.97809	0.791366	8.30296	0.756972	3.98252
GC	400	416	0.759	0.147	2.55	1.791	47.2317	0.269967	40.9472	26.697	17.4628	9.60839	0.451847	0.577113	4.29994	0.176175	3.08838		0.66797								0	3.10921
GC	420	436	0.907	0.198	3.041	2.134	54.5979	0.258074	41.4661	37.4061	18.7284	12.4314	0.755434	3.52564	4.52976	0.173776	3.43794	0.0814807	0.753747			8.4192	2.90537	2.67218	0.941838	14.9387	0.517608	3.50848
GC	440	456	1.035	0.194	3.126	2.091	53.9583	0.260183	44.0606	32.1181	18.7067	11.3035	0.561711	0.694654	5.2556	0.179328	3.44705	0.0304284	0.828345								0.193297	3.85571
GC	460	476	1.022	0.195	3.179	2.157	54.6485	0.259856	46.3853	32.181	18.8095	11.6139	0.594679	0.708244	4.49699	0.189066	3.57448	0.0769606	0.576229			4.53627	2.40588	2.46097	0.934278	10.3373	0.488893	2.68219
GC	475	491	1.179	0.218	3.5	2.321	58.9137	0.256685	43.9319	38.5667	19.9666	12.3181	0.763665	0.923466	7.40661	0.188557	3.51062	0.07964	1.20077
		Already in PANGAEA, but with core depth, not sediment depths!

## Sheet: solid Fe isotopes
			MgCl2				Acetat					Hydroxylamine-HCl					Dithionite					Oxalate
			Endwert	STD	Endwert	STD		2SD	Endwert	2SD			2SD	Endwert	2SD			2SD	Endwert	2SD		Endwert	2SD	Endwert	2SD
Core	Core depth (cm)	Actual Depth (cm)	Delta 56/54Fe	external	Delta 57/54Fe		Delta 56/54Fe		Delta 57/54Fe		n	Delta 56/54Fe		Delta 57/54Fe		n	Delta 56/54Fe		Delta 57/54Fe		n	Delta 56/54Fe		Delta 57/54Fe		n
HE443/010-3	10	26					-0.150507	0.064438	-0.226927	0.16344	3	-0.0348552		0.102487								-0.206311		-0.370993
HE443/010-3	30	46					-0.199427	0.164684	-0.284032	0.249056	6	-0.171024		-0.160217			0.155473		0.256524			-0.088116		-0.214979
HE443/010-3	50	66					-0.296915	0.270331	-0.402553	0.451428	5	-0.142551		-0.219679			0.177004		0.276121			-0.116221	0.0725282	-0.170293	0.264284	3
HE443/010-3	70	86					-0.126456	0.128056	-0.126357	0.323355	3	-0.0849128	0.0749037	-0.109816	0.0625881	3	0.148361	0.0610332	0.298721	0.0645704	2	-0.132542		-0.0685378
HE443/010-3	120	136					-0.240044	0.114563	-0.362575	0.0753191	4	-0.267499	0.0547115	-0.334548	0.0913209	3	0.191213		0.362641			-0.113059		-0.0690557
HE443/010-3	140	156					-0.14444	0.0678972	-0.191545	0.169544	4	-0.193594		-0.379598			0.138718		0.241427			-0.0842701		-0.16809
HE443/010-3	160	176					-0.215544	0.177146	-0.306291	0.375963	4	-0.309933		-0.468765			0.217559		0.323222			-0.0754245		-0.135958
HE443/010-3	180	196					-0.179682	0.160962	-0.255667	0.293841	4	-0.175845	0.0229116	-0.240506	0.10964	3	0.213621		0.395406			-0.103246		-0.217809
HE443/010-3	200	216					0.0887848	0.167757	0.137502	0.358474	4	-0.185949		-0.299678			0.228684		0.400579			-0.12442	0.121471	-0.0896895	0.031585	2
HE443/010-3	220	236					-0.257305	0.212192	-0.319688	0.299027	5	-0.0492074		-0.174654			0.228219		0.419848			-0.0866951	0.0281397	-0.106069	0.0138081	2
HE443/010-3	240	256					-0.413537	0.108463	-0.627358	0.1362	5	-0.240456	0.0126002	-0.312048	0.0787279	2	0.118072	0.0599376	0.133318	0.0694098	2	-0.116731		-0.1102
HE443/010-3	260	276					-0.518616	0.2037	-0.780167	0.288244	5	-0.253289		-0.496338			0.249379		0.430415			0.000295691		0.0937259
HE443/010-3	280	296					-0.335116	0.0780885	-0.504942	0.13943	4	-0.157479	0.0517432	-0.299782	0.332774	3	0.167093	0.0141971	0.21775	0.285787	2	0.0206349		0.0238698
HE443/010-3	300	316					-0.291819	0.0515381	-0.443234	0.172335	4	-0.223626		-0.227924			0.163982		0.279919			-0.0796105		-0.00151706
HE443/010-3	320	336					-0.252403	0.130575	-0.372323	0.249114	4	-0.323524	0.0280761	-0.451924	0.00626556	2						-0.135151		-0.137518
HE443/010-3	340	356					-0.217312	0.220125	-0.330768	0.346271	5	-0.216271	0.00838016	-0.321157	0.170496	2	0.154856	0.00260444	0.191079	0.197093	2	-0.0357803	0.00664569	-0.0768416	0.0511753	3
HE443/010-3	380	396					-0.385631	0.105975	-0.53805	0.198971	5	-0.231246		-0.271366			0.247081		0.345414			-0.111542	0.0411408	-0.129783	0.144408	3
HE443/010-3	420	436					-0.541481	0.210392	-0.802922	0.257117	6	-0.0717086		-0.133883			0.183642		0.324869			-0.0532835		-2.69082e-05
n: number of analyses (same sample)
