# Supplementary material for: Stable iron isotope signals indicate a “pseudo-abiotic” process driving deep iron release in methanic sediments
Source: Copernicus journal article supplement (doi:10.5194/bg-22-1673-2025), 2025-03-31
Supplement: Supplementary file 2 [file bg-22-1673-2025-supplement.zip]

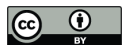

## *Supplement of*

# **Stable iron isotope signals indicate a “pseudo-abiotic” process driving deep iron release in methanic sediments**

**Susann Henkel et al.**

*Correspondence to:* Susann Henkel (susann.henkel@awi.de)

- bg-22-1673-2025-supplement-title-page.pdf
- Geochemistry HE443\_010-2 and -3, PANGAEA.xlsx
- Radiographs, HE443 10-3
  - HE443\_010-3\_000-050\_x-ray.tif
  - HE443\_010-3\_050-088\_x-ray.tif
  - HE443\_010-3\_088-138\_x-ray.tif
  - HE443\_010-3\_138-188\_x-ray.tif
  - HE443\_010-3\_188-238\_x-ray.tif
  - HE443\_010-3\_238-288\_x-ray.tif
  - HE443\_010-3\_288-338\_x-ray.tif
  - HE443\_010-3\_338-388\_x-ray.tif
  - HE443\_010-3\_388-438\_x-ray.tif
  - HE443\_010-3\_438-488\_x-ray.tif
- Supplement BG submission\_16.7.2024.pdf

The copyright of individual parts of the supplement might differ from the article licence.
